# Supplementary material for: Higher Lipopolysaccharide Binding Protein and Chemerin Concentrations Were Associated with Metabolic Syndrome Features in Pediatric Subjects with Abdominal Obesity during a Lifestyle Intervention
Source: PubMed Central journal article supplement (PMC7909441; doi:10.3390/nu13020289), 2021-01-20
Supplement: nutrients-13-00289-s001.pdf [file nutrients-13-00289-s001.pdf]

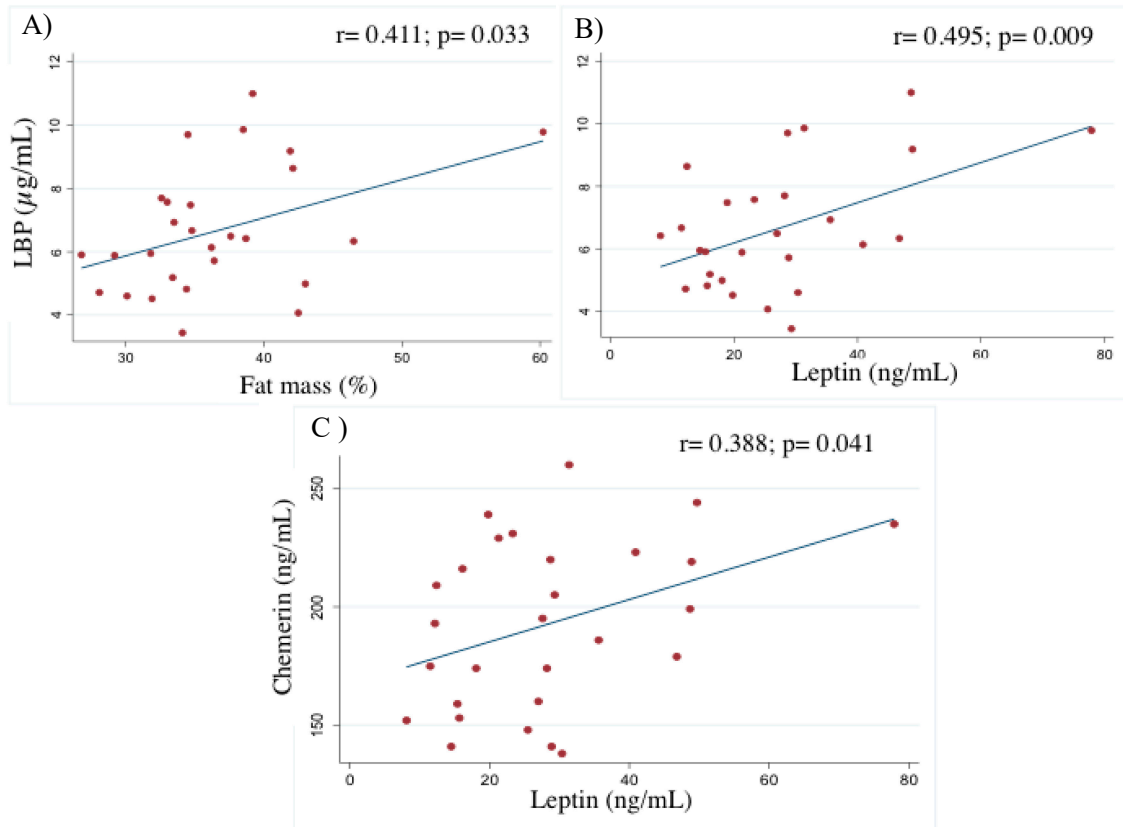

**Figure S1.** Correlation between LBP levels and fat mass [A] and leptin levels [B]. Correlation between chemerin and leptin levels [C].
